1  
2  
3  
4  
5  
6  
7  
8  
9  
10  
11  
12  
13  
14  
15  
16  
17  
18  
19  
20  
21  
22  
23  
24  
25

# Impact of school closures and reopening on COVID-19 caseload in 6 cities of Pakistan: An Interrupted Time Series Analysis

**Short title: Impact of school closures and reopening on COVID-19 cases**

Abdul Mueed<sup>1</sup>, Taimoor Ahmad<sup>1</sup>, Mujahid Abdullah<sup>1</sup>, Faisal Sultan<sup>2</sup>, Adnan Ahmad Khan<sup>2,3\*</sup>

<sup>1</sup>Akhter Hameed Khan Foundation, Islamabad, Pakistan

<sup>2</sup>Ministry of National Health Services, Regulation and Coordination, Islamabad, Pakistan

<sup>3</sup>Research and Development Solutions, Islamabad, Pakistan

\*Corresponding author:

Email: [adnan@resdev.org](mailto:adnan@resdev.org) (AAK)

## Disclosures:

This work was supported, in whole or in part, by the Bill & Melinda Gates Foundation [grant number: INV-025171]. Under the grant conditions of the Foundation, a Creative Commons Attribution 4.0 Generic License has already been assigned to the Author Accepted Manuscript version that might arise from this submission.

There are no conflicts of interest.

## 26 Abstract

27 Schools were closed all over Pakistan on November 26, 2020 to reduce community  
28 transmission of COVID-19 and reopened between January 18 and February 1, 2021.  
29 However, these closures were associated with significant economic and social costs,  
30 prompting a review of effectiveness of school closures to reduce the spread of COVID-  
31 19 infections in a developing country like Pakistan. A single-group interrupted time series  
32 analysis (ITSA) was used to measure the impact of school closures, as well as reopening  
33 schools on daily new COVID-19 cases in 6 major cities across Pakistan: Lahore, Karachi,  
34 Islamabad, Quetta, Peshawar, and Muzaffarabad. We found that closing schools reduced  
35 COVID-19 incidence in the community by approximately a third of all cases nationwide.  
36 However, any benefits were contingent on continued closure of schools, as cases  
37 bounced back once schools reopened. School closures are associated with a clear and  
38 statistically significant reduction in COVID-19 cases by 0.07 to 0.63 cases per 100,000  
39 population, while reopening schools is associated with a statistically significant increase.  
40 Lahore is an exception to the effect of school closures, but it too saw an increase in  
41 COVID-19 cases after schools reopened in early 2021. We show that closing schools was  
42 a viable policy option, especially before vaccines became available. However, its social  
43 and economic costs must also be considered.

## 44 Introduction

45 Since the beginning of the global spread of COVID-19 and before effective vaccines  
46 became available, non-pharmaceutical interventions (NPIs), either barriers or means to  
47 limit contact between individuals, were the mainstay to control the spread of COVID-19.  
48 Perhaps the most widely debated among these NPIs was the closure of schools, which  
49 drew criticism for the significant social, learning, economic [1, 2], and physical and mental  
50 health costs [3-6] associated with them. Notably, these costs are disproportionately borne  
51 by already disadvantaged families [1, 7], thereby exacerbating social and economic  
52 inequalities [8].

53 Prior studies suggest that children infected with COVID-19 are often asymptomatic or  
54 have mild symptoms identical to other common respiratory infections [9, 10], and yet they  
55 can transmit the infection even when they feel well. Children have also been key  
56 spreaders in other respiratory infections such as influenza, because of prolonged contact  
57 in close proximities with other children at schools [11].

58 Early evidence on the effect of school closures on epidemic transmission of COVID-19  
59 seemed mixed. Initial, and often modeling-based studies, suggested that closing schools  
60 may not help reduce COVID-19 transmission in communities [12-15]. However, more  
61 recent, and more empirically based studies have tended to show a role for school closure  
62 in reducing cases in the community [16-23]. In low- and middle-income countries such as  
63 Pakistan where learning is already inadequate and remote learning solutions are all too  
64 often unavailable for most students [24], it is paramount that such a social policy be used  
65 only if absolutely supported by evidence of a benefit in limiting COVID-19 transmission  
66 and then too, only as a means of last resort. We explore the changes in daily cases on

67 COVID-19 pre and post school closures in Pakistan using a single-group Interrupted Time  
68 Series Analysis (ITSA).

69 This paper is a continuation of our earlier work, which examined the effects of school  
70 closures on the daily cases of COVID-19 in Islamabad vs. Peshawar, during the same  
71 period as in this study [25]. However, this study attempts to examine the effect of school  
72 closures with a different methodology, and also with a larger sample of cities.

## 73 **Methods**

74 In this paper we conduct a pre- and post-school closures and reopening analysis of  
75 changes in the daily incidence of COVID-19 cases in 6 cities of Pakistan: Lahore, Karachi,  
76 Islamabad, Quetta, Peshawar, and Muzaffarabad using a single-group ITSA. We use a  
77 single-group ITSA because it is a quasi-experimental tool that is particularly useful when  
78 data cannot be fully randomized, there is no comparison group, and there is a need to  
79 consider the effect of only one intervention.

80 This suits our study as, in Pakistan, all non-school NPIs in were enacted in groups –  
81 except for the closure of schools. For example, marriage hall restrictions and ban on large  
82 scale gatherings were notified at the same time, as were mask-wearing, broader “smart”  
83 lockdowns (lockdowns in parts of cities), and reduced market timings. School closures,  
84 on the other hand, were universally enforced and applied to all schools – whether day  
85 schools or boarding schools – and to students of all grades across Pakistan [26]. These  
86 were the only NPI that changed (i.e. were applied and then lifted) during the period of  
87 examination in this study.

88 Data for this analysis were sourced from the daily National Situation Reports (Sitreps)  
89 published by the National Emergency Operations Centre (NEOC) in Islamabad, Pakistan.  
90 This data is anonymized and aggregated by city, with no disaggregation by age, gender,  
91 ethnicity, or any other potentially identifying characteristic. We use this data for an  
92 inferential analysis of the change in daily COVID-19 incidence in the overall populations  
93 of the 6 aforementioned cities, regardless of demographic characteristics, due to the  
94 change in one particular NPI. It is because this NPI is the only policy intervention that  
95 could be isolated in our chosen time period of observation.

96 We estimated 2 sets of ordinary least square (OLS) regressions for each city using a 10-  
97 or 20-day delay since COVID-19 incidence changes from school-related NPIs take effect  
98 10 [27] or more days [17, 28, 29] after closures or reopening. Daily new COVID-19 cases  
99 were taken for equally spaced time frames with 10- and 20-day delay after the actual  
100 school closures and reopening dates. In order to analyze the effect of school closures  
101 and reopening, we took a total of 60 days for pre- and post-intervention periods. Table 1  
102 shows the dates of school closures and reopening.

103 **Table 1. Key intervention dates**

|                          | <b>School Closures</b> | <b>School Reopening</b> |
|--------------------------|------------------------|-------------------------|
| <b>Original</b>          | November 26, 2020      | February 1, 2021        |
| <b>With 10-day delay</b> | December 6, 2020       | February 11, 2021       |
| <b>With 20-day delay</b> | December 16, 2020      | February 21, 2021       |

104 Note: 2 dates were removed from analysis: 4th November 2020 for Quetta and 7th December 2020 for  
105 Muzaffarabad because no data for these dates was available.

## 106 Model Specification

107 Our model specification is adapted from Linden and detailed below [30]:

$$108 Y_{ti} = \beta_0 + \beta_1 T_{ti} + \beta_2 X_{ti} + \beta_3 X_{ti} T_{ti} + \epsilon_{ti}$$

109 Where

- 110 1)  $Y_{ti}$ , our outcome variable, is the daily number of new COVID-19 cases for each  
111 city  $i$ ;
- 112 2)  $\beta_0$ , the constant term, is the starting level of the daily new COVID-19 cases in each  
113 city  $i$ ;
- 114 3)  $T_{ti}$  is the time period since the beginning of this study, and the coefficient  $\beta_1$  shows  
115 the slope of daily new COVID-19 cases until the start of the intervention;
- 116 4)  $X_{ti}$  is a dummy variable indicating the intervention period (post intervention = 1,  
117 and 0 otherwise);
- 118 5)  $\beta_2$  explains the change in daily COVID-19 cases that occurs in the time period  
119 immediately followed by the school closure/reopening (our interventions);
- 120 6)  $X_{ti} T_{ti}$  is the interaction term between the intervention period and the time since the  
121 start of the study; and,
- 122 7)  $\beta_3$  represents the difference between the pre- and post-intervention slopes for daily  
123 new COVID-19 cases.

124 To get a singular, direct estimate of the effect of closing/reopening schools, we used the  
125 *lincom* estimate which is the sum of  $\beta_1$  and  $\beta_3$  [31].

$$126 Treated = \beta_1 T_{ti} + \beta_3 X_{ti} T_{ti}$$

127 This generates a separate variable that sums the values of  $\beta_1$  and  $\beta_3$ .

128 To adjust for autocorrelation and possible heteroskedasticity, we used Newey-West  
129 standard errors in our regression models [32]. Cumby-Huizinga test for autocorrelation  
130 was performed on each regression model to identify correct lag structure. Linktest was  
131 applied to check if the models were correctly specified. Stata 16 software package was  
132 used for the analysis.

## 133 Results

134 Our descriptive results showing means and standard deviations of daily COVID-19 cases  
135 (per 100,000 population) are presented in Table 2. These were calculated for school  
136 closures and reopening periods of each city, separately for pre- and post-intervention  
137 periods. For 10-day delay, Islamabad showed highest cases (per 100,000 population)  
138 (18.80, SD: 4.411), while Quetta showed the lowest (0.722, SD: 0.294) in the pre-  
139 intervention period of school closures; same trend followed in school reopening pre-  
140 intervention period. Islamabad and Quetta also had the highest and the lowest cases (per

141 100,000 population) in pre-intervention periods of 20-day delay school closures and  
 142 reopening.

143 **Table 2. Summary statistics of daily COVID-19 cases (per 100,000 population) in**  
 144 **each city**

|                         | City         | 10-days Delay    |                   | 20-days Delay    |                   |
|-------------------------|--------------|------------------|-------------------|------------------|-------------------|
|                         |              | Pre-intervention | Post-intervention | Pre-intervention | Post-intervention |
| <b>School Closures</b>  | Lahore       | 1.23 (0.34)      | 1.62 (0.48)       | 1.32 (0.34)      | 1.9 (0.39)        |
|                         | Karachi      | 5.53 (2.07)      | 6.66 (2.13)       | 7.26 (1.9)       | 5.77 (1.66)       |
|                         | Islamabad    | 18.8 (4.41)      | 10.4 (4.42)       | 18.4 (4.7)       | 7.62 (2.12)       |
|                         | Quetta       | 0.72 (0.29)      | 0.26 (0.11)       | 0.6 (0.3)        | 0.22 (0.1)        |
|                         | Peshawar     | 1.59 (0.76)      | 2.18 (0.94)       | 2.11 (0.86)      | 1.93 (0.81)       |
|                         | Muzaffarabad | 4.58 (2.54)      | 0.82 (0.79)       | 3.11 (2.41)      | 0.52 (0.61)       |
| <b>School Reopening</b> | Lahore       | 1.64 (0.43)      | 2.130 (0.88)      | 1.48 (0.34)      | 3.35 (1.55)       |
|                         | Karachi      | 3.94 (2.03)      | 1.045 (0.37)      | 2.38 (1.25)      | 0.86 (0.28)       |
|                         | Islamabad    | 4.9 (1.26)       | 7.945 (3.79)      | 4.74 (0.98)      | 14.6 (9.34)       |
|                         | Quetta       | 0.16 (0.08)      | 0.145 (0.13)      | 0.12 (0.07)      | 0.22 (0.13)       |
|                         | Peshawar     | 1.55 (0.55)      | 1.248 (0.49)      | 1.28 (0.41)      | 1.9 (1.14)        |
|                         | Muzaffarabad | 0.19 (0.25)      | 0.55 (0.63)       | 0.19 (0.23)      | 1.22 (1.34)       |

145 Means of daily COVID-19 cases over each period are reported. Standard deviations are in parentheses.

146 After adding a 10-day delay after the actual date of school closures (Table 3), the rate of  
 147 change in daily COVID-19 cases declined following closure of schools in Karachi,  
 148 Islamabad, Quetta, and Peshawar; the reductions per 100,000 population were by -0.16  
 149 cases (95% CI: -0.23, -0.13) in Karachi, -0.41 cases (95% CI: -0.53, -0.30) in Islamabad,  
 150 -0.01 cases (95% CI: -0.01, -0.00) in Quetta, and -0.06 cases (95% CI: -0.08, -0.03) in  
 151 Peshawar. In Lahore, daily COVID-19 cases continued to rise at a rate of 0.03 cases  
 152 (95% CI: 0.01, 0.05) per 100,000 population after the closure of schools. For  
 153 Muzaffarabad, the rate of change of COVID-19 cases was declining both before and after  
 154 the school closure, at -0.11 cases (95% CI: -0.16, -0.06) and -0.05 cases (95% CI: -0.06,  
 155 -0.03) per 100,000 population, respectively.

156 **Table 3. Rates of Change in Daily COVID-19 cases (per 100,000 population)**  
 157 **through Interrupted Time Series Analysis**

| City   | Delay after original date of intervention | Rate of Change in Daily COVID-19 cases (per 100,000 population) (95% CI), p-value |                                            |                                   |                                    |                                              |                                     |
|--------|-------------------------------------------|-----------------------------------------------------------------------------------|--------------------------------------------|-----------------------------------|------------------------------------|----------------------------------------------|-------------------------------------|
|        |                                           | School Closure                                                                    |                                            |                                   | School Reopening                   |                                              |                                     |
|        |                                           | (1) Pre-Closure trend: $\beta_1$                                                  | (2) Post-Closure trend: $\beta_1, \beta_3$ | (3) Closure Difference: $\beta_3$ | (1) Pre-Reopening trend: $\beta_1$ | (2) Post-Reopening trend: $\beta_1, \beta_3$ | (3) Reopening Difference: $\beta_3$ |
| Lahore | 10-day Delay                              | 0.02*<br>(0.01, 0.04)<br>p<0.01                                                   | 0.03*<br>(0.01, 0.05)<br>p<0.01            | 0.00<br>(-0.02, 0.03)             | -0.03*<br>(-0.05, -0.02)<br>p<0.01 | 0.09*<br>(0.06, 0.11)<br>p<0.01              | 0.12*<br>(0.09, 0.15)<br>p<0.01     |
|        | 20-day Delay                              | -0.00<br>(-0.00, 0.00)                                                            | 0.01*<br>(0.00, 0.02)<br>p<0.05            | 0.01*<br>(0.00, 0.02)<br>p<0.05   | -0.02*<br>(-0.04, 0.00)<br>p<0.01  | 0.16*<br>(0.12, 0.20)<br>p<0.01              | 0.18*<br>(0.14, 0.23)<br>p<0.01     |

|                     |              |                                    |                                    |                                    |                                    |                                    |                                 |
|---------------------|--------------|------------------------------------|------------------------------------|------------------------------------|------------------------------------|------------------------------------|---------------------------------|
| <b>Karachi</b>      | 10-day Delay | 0.22*<br>(0.18, 0.26)<br>p<0.01    | -0.16*<br>(-0.23, -0.13)<br>p<0.01 | -0.39*<br>(-0.46, -0.33)<br>p<0.01 | -0.20*<br>(-0.24, -0.16)<br>p<0.01 | -0.03*<br>(-0.04, -0.02)<br>p<0.01 | 0.17*<br>(0.12, 0.21)<br>p<0.01 |
|                     | 20-day Delay | 0.16*<br>(0.07, 0.25)<br>p<0.01    | 0.00<br>(-0.10, 0.10)              | -0.16*<br>(-0.26, -0.05)<br>p<0.01 | -0.11*<br>(-0.14, -0.08)<br>p<0.01 | -0.01<br>(-0.02, 0.00)<br>p<0.10   | 0.10*<br>(0.07, 0.13)<br>p<0.01 |
| <b>Islamabad</b>    | 10-day Delay | 0.21*<br>(0.07, 0.36)<br>p<0.01    | -0.41*<br>(-0.53, -0.30)<br>p<0.01 | -0.63*<br>(-0.81, -0.44)<br>p<0.01 | -0.08*<br>(-0.12, -0.04)<br>p<0.01 | 0.34*<br>(0.18, 0.50)<br>p<0.01    | 0.42*<br>(0.24, 0.60)<br>p<0.01 |
|                     | 20-day Delay | -0.22<br>(-0.48, 0.05)             | -0.12*<br>(-0.21, -0.03)<br>p<0.05 | 0.10<br>(-0.18, 0.38)              | 0.05*<br>(0.00, 0.09)<br>p<0.05    | 0.98*<br>(0.69, 1.26)<br>p<0.01    | 0.93*<br>(0.63, 1.23)<br>p<0.01 |
| <b>Quetta</b>       | 10-day Delay | 0.01<br>(-0.01, 0.02)              | -0.01*<br>(-0.01, -0.00)<br>p<0.01 | -0.01<br>(-0.03, 0.01)             | -0.01*<br>(-0.01, -0.00)<br>p<0.01 | 0.01*<br>(0.00, 0.01)<br>p<0.01    | 0.01*<br>(0.01, 0.02)<br>p<0.01 |
|                     | 20-day Delay | -0.02*<br>(-0.03, -0.01)<br>p<0.01 | -0.00<br>(-0.01, 0.00)             | 0.02*<br>(0.01, 0.03)<br>p<0.01    | -0.00*<br>(-0.01, -0.00)<br>p<0.01 | 0.01*<br>(0.00, 0.01)<br>p<0.01    | 0.01*<br>(0.00, 0.02)<br>p<0.01 |
| <b>Peshawar</b>     | 10-day Delay | 0.05*<br>(0.03, 0.08)<br>p<0.01    | -0.06*<br>(-0.08, -0.03)<br>p<0.01 | -0.11*<br>(-0.14, -0.08)<br>p<0.01 | -0.04*<br>(-0.06, -0.04)<br>p<0.01 | 0.02*<br>(0.01, 0.04)<br>p<0.01    | 0.06*<br>(0.05, 0.08)<br>p<0.01 |
|                     | 20-day Delay | 0.04*<br>(0.01, 0.07)<br>p<0.01    | -0.03<br>(-0.06, 0.01)             | -0.07*<br>(-0.11, -0.02)<br>p<0.01 | -0.03*<br>(-0.04, -0.02)<br>p<0.01 | 0.10*<br>(0.06, 0.14)<br>p<0.01    | 0.13*<br>(0.08, 0.18)<br>p<0.01 |
| <b>Muzaffarabad</b> | 10-day Delay | -0.11*<br>(-0.16, -0.06)<br>p<0.01 | -0.05*<br>(-0.06, -0.03)<br>p<0.01 | 0.06*<br>(0.01, 0.12)<br>p<0.05    | 0.00<br>(-0.01, 0.01)<br>p<0.01    | 0.04*<br>(0.02, 0.06)<br>p<0.01    | 0.04*<br>(0.01, 0.06)<br>p<0.01 |
|                     | 20-day Delay | -0.17*<br>(-0.26, -0.07)<br>p<0.01 | -0.03<br>(-0.06, 0.00)             | 0.14*<br>(0.04, 0.24)<br>p<0.01    | 0.01*<br>(0.00, 0.01)<br>p<0.01    | 0.09*<br>(0.04, 0.16)<br>p<0.01    | 0.09*<br>(0.03, 0.15)<br>p<0.01 |

158 \*Significant at 95% CI. Newey-West standard errors were used.

159 The opposite trend was seen following schools reopening in early 2021. Before schools  
 160 reopened, accounting for a 10-day delay from the actual date of reopening, the rate of  
 161 change of daily COVID-19 cases per 100,000 population was declining in every city by:  
 162 0.03 cases (95% CI: -0.05, -0.02) in Lahore, -0.20 cases (95% CI: -0.24, -0.16) in Karachi,  
 163 -0.08 cases (95% CI: 0.12, -0.04) in Islamabad, -0.01 cases (95% CI: -0.01, -0.00) in  
 164 Quetta, and by -0.04 cases (95% CI: -0.06, -0.04) in Peshawar. Muzaffarabad's pre-  
 165 reopening trend is not statistically significant at 95% confidence level.

166 After schools reopened, the rate of change of daily COVID-19 cases became positive in  
 167 every city – except in Karachi, where the rate remained negative at -0.03 cases (95% CI:  
 168 -0.04, -0.02) per 100,000 population. For the remaining cities, daily new COVID-19 cases  
 169 began to increase at a rate of 0.09 cases (95% CI: 0.06, 0.11) per 100,000 population in  
 170 Lahore, 0.34 cases (95% CI: 0.18, 0.50) in Islamabad, 0.01 cases (95% CI: 0.00, 0.01) in  
 171 Quetta, 0.02 cases (95% CI: 0.01, 0.04) in Peshawar, and 0.09 cases (95% CI: 0.04,  
 172 0.16) in Muzaffarabad.

173 These effects were similar but more modest when allowing for a 20-day delay after the  
 174 actual date of school closures. The post-closure trend remained statistically significant in  
 175 Lahore, where the rate of change in cases continued to rise at 0.01 cases (95% CI: 0.00,  
 176 0.02) per 100,000 population, while Islamabad's post-closure trend showed a decline at



177 a rate of -0.12 (95% CI: -0.21, -0.03). Post-reopening, in Islamabad, the rate of daily new  
178 COVID-19 cases changed from 0.05 cases (95% CI: 0.00, 0.09) per 100,000 to 0.98  
179 cases (95% CI: 0.69, 1.26) per 100,000 population while in Muzaffarabad, rate of change  
180 went from 0.01 cases (95% CI: 0.00, 0.01) before schools were reopened to 0.09 cases  
181 (95% CI: 0.04, 0.16) once schools opened.

## 182 Discussion

183 We show that school closures are associated with fewer daily new COVID-19 cases  
184 compared to pre-closures by 5 to 62 actual daily cases in individual cities.  
185 Correspondingly, reopening schools appear to increase them by 1 to 35 daily cases. The  
186 association is the strongest in Karachi, Lahore, Peshawar, and Islamabad [33], which are  
187 larger, denser cities, and had the most cases; while the association was modest for  
188 sparse and smaller cities of Quetta and Muzaffarabad, that also had fewer overall cases.  
189 Since average daily cases in Pakistan in that period were around 3000 cases per day,  
190 closure of schools reduced incident cases by approximately a third.

191 Pakistan saw a much lower reduction in cases with school closures than was seen in  
192 many other countries. For example, our reduction of 5 to 62 daily cases per 100,000  
193 population is considerably smaller than the 371 seen in the USA [17]. However, this is  
194 consistent with the fact that cities with fewer cases had the least reductions in cases when  
195 schools were closed. Pakistan has also seen much fewer cases, hospitalizations, and  
196 deaths from COVID-19 than in Europe or North America, perhaps relating to its sparser  
197 social networks leading to fewer contacts among individuals within the community [34], or  
198 perhaps higher levels of nonspecific immunity from prior infections with disparate viruses  
199 [35]. However, both of these possible explanations are speculative at the moment.

200 Reductions in cases with school closure is better understood in the context of the  
201 education set up in Pakistan. Most school-going children in cities go to low-cost-private  
202 schools where they sit in small classrooms with little space for social distancing [36].  
203 Additionally, most children commute to and from schools in small vehicles – up to 15-17  
204 children in the back of a minivan. Children then come into contact with adults at school  
205 (teachers and custodian staff), then at home (parents and elder family members), and in  
206 so doing become a conduit for COVID-19 spread outside of schools. As 31% of total  
207 population of Pakistan falls in the school going age [37], schools in Pakistan then  
208 essentially function as “super spreader” locations for COVID-19.

209 Our findings are consistent with the global evidence, as well as the results of our own  
210 previous work [25], that school closures are associated with reduction in COVID-19  
211 transmission in communities [17, 29]. In the US, school closures were associated with  
212 reduced COVID-19 caseloads [15], deaths [19, 38, 39], and hospitalizations by as much as  
213 half [19]. Similarly, the timely closure of schools and high education institutes were found  
214 to lower COVID-19 transmission rates in the European Union and other developed  
215 countries [40-43]. Earlier in the epidemic, a number of modeling studies had predicted  
216 more modest effects of such closures [19, 21, 24, 40-42]. However, more recent studies  
217 using empirical community transmission data have generally shown a more robust

218 association between school closures and reductions in community cases of COVID-19  
219 [\[21\]](#).

## 220 **Limitations**

221 There are limitations of this analysis. The daily COVID-19 data are aggregated nationally,  
222 regionally, and by certain major cities, with no disaggregation by age or gender.  
223 Additionally, we acknowledge that a pre- and post-intervention analysis itself has  
224 limitations. For example, it may not effectively discern the effects of an intervention from  
225 that of a long-term trend on an outcome variable. This is referred to as the “maturation”  
226 threat to the internal validity of a pre- and post-intervention analysis. However, this has  
227 negligible impact on our analysis, as we consider a total of 60 days for each ITSA  
228 regression, in each of the 6 cities, when examining the effects of the intervention after  
229 accounting for sufficient delays – at 10 and 20 days – to be sure of the effects of the  
230 interventions.

231 It is difficult to explain why Lahore did not show any reduction in cases after school  
232 closures. It is possible that the epidemic affected cities at different points in time and that  
233 it was at a relatively lower level in Lahore during the study period. We also acknowledge  
234 that there could be potential cross-contamination of COVID-19 cases between Islamabad  
235 and Peshawar, which are separated by a 2-hours commute by road, and between  
236 Islamabad and Lahore, which are 4-hours apart by road. However, there are no data on  
237 the magnitude of any potential contamination due to bilateral intra-city travel.  
238 Nevertheless, were there significant contamination between the cities, one would have  
239 expected to see convergence in COVID-19 caseloads between them, and there is no  
240 evidence that this occurred. Finally, measurement of the serious social, economic, and  
241 educational attainment costs from school closures was beyond the scope of our study.

## 242 **Conclusions**

243 School closures may be associated with lower transmission of COVID-19 in communities  
244 and such closures are an important policy tool to stop the spread of COVID-19. However,  
245 their social and economic costs are high, perhaps more so in a developing country. The  
246 balance of these costs and benefits must inform this effective NPI specially when other  
247 measures, including vaccines, are being planned.

## 248 **Acknowledgements**

249 We thank Testing, Tracing and Quarantining (TTQ) team at the National Command and  
250 Operation Centre (NCO) and the National Emergency Operations Centre (NEOC) for  
251 facilitating our work.



## 252 **References**

- 253 1. Hanushek EA, Woessmann L. The economic impacts of learning losses. 2020.  
254 doi: <https://doi.org/10.1787/21908d74-en>.
- 255 2. Sadique MZ, Adams EJ, Edmunds WJ. Estimating the costs of school closure for  
256 mitigating an influenza pandemic. *BMC Public Health*. 2008;8:135. Epub 2008/04/26.  
257 doi: 10.1186/1471-2458-8-135. PubMed PMID: 18435855; PubMed Central PMCID:  
258 PMCPMC2377259.
- 259 3. Kinsey EW, Hecht AA, Dunn CG, Levi R, Read MA, Smith C, et al. School  
260 Closures During COVID-19: Opportunities for Innovation in Meal Service. *Am J Public*  
261 *Health*. 2020;110(11):1635-43. Epub 20200917. doi: 10.2105/AJPH.2020.305875.  
262 PubMed PMID: 32941069; PubMed Central PMCID: PMCPMC7542295.
- 263 4. Kishida K, Tsuda M, Waite P, Creswell C, Ishikawa SI. Relationships between  
264 local school closures due to the COVID-19 and mental health problems of children,  
265 adolescents, and parents in Japan. *Psychiatry Res*. 2021;306:114276. Epub 20211108.  
266 doi: 10.1016/j.psychres.2021.114276. PubMed PMID: 34798486; PubMed Central  
267 PMCID: PMCPMC8585496.
- 268 5. Amran MS, Jamaludin KA. The Impact of Unplanned School Closures on  
269 Adolescent Behavioral Health During the Covid-19 Pandemic in Malaysia. *Front Public*  
270 *Health*. 2021;9:639041. Epub 20210607. doi: 10.3389/fpubh.2021.639041. PubMed  
271 PMID: 34164364; PubMed Central PMCID: PMCPMC8215535.
- 272 6. Tang S, Xiang M, Cheung T, Xiang YT. Mental health and its correlates among  
273 children and adolescents during COVID-19 school closure: The importance of parent-  
274 child discussion. *J Affect Disord*. 2021;279:353-60. Epub 2020/10/26. doi:  
275 10.1016/j.jad.2020.10.016. PubMed PMID: 33099049; PubMed Central PMCID:  
276 PMCPMC7550131.
- 277 7. Andrew A, Cattan S, Costa Dias M, Farquharson C, Kraftman L, Krutikova S, et  
278 al. Inequalities in Children's Experiences of Home Learning during the COVID-19  
279 Lockdown in England\*. *Fiscal Studies*. 2020;41(3):653-83. doi:  
280 <https://doi.org/10.1111/1475-5890.12240>.
- 281 8. Armitage R, Nellums LB. Considering inequalities in the school closure response  
282 to COVID-19. *Lancet Glob Health*. 2020;8(5):e644. Epub 2020/03/31. doi:  
283 10.1016/S2214-109X(20)30116-9. PubMed PMID: 32222161; PubMed Central PMCID:  
284 PMCPMC7195275.
- 285 9. Wong JJM, Abbas Q, Chuah SL, Malisie RF, Pon KM, Katsuta T, et al.  
286 Comparative Analysis of Pediatric COVID-19 Infection in Southeast Asia, South Asia,  
287 Japan, and China. *Am J Trop Med Hyg*. 2021;105(2):413-20. Epub 20210615. doi:  
288 10.4269/ajtmh.21-0299. PubMed PMID: 34129517; PubMed Central PMCID:  
289 PMCPMC8437183.

- 290 10. Musa OAH, Chivese T, Bansal D, Abdulmajeed J, Ameen O, Islam N, et al.  
291 Prevalence and determinants of symptomatic COVID-19 infection among children and  
292 adolescents in Qatar: a cross-sectional analysis of 11 445 individuals. *Epidemiol Infect.*  
293 2021;149:e203. Epub 20210914. doi: 10.1017/S095026882100203X. PubMed PMID:  
294 34517936; PubMed Central PMCID: PMC8446592.
- 295 11. Goldstein E, Nguyen HH, Liu P, Viboud C, Steiner CA, Worby CJ, et al. On the  
296 Relative Role of Different Age Groups During Epidemics Associated With Respiratory  
297 Syncytial Virus. *The Journal of infectious diseases.* 2018;217(2):238-44. doi:  
298 10.1093/infdis/jix575. PubMed PMID: 29112722; PubMed Central PMCID:  
299 PMC5853559.
- 300 12. Fukumoto K, McClean CT, Nakagawa K. No causal effect of school closures in  
301 Japan on the spread of COVID-19 in spring 2020. *Nat Med.* 2021;27(12):2111-9. Epub  
302 20211027. doi: 10.1038/s41591-021-01571-8. PubMed PMID: 34707318; PubMed  
303 Central PMCID: PMC8674136.
- 304 13. Isphording IE, Lipfert M, Pestel N. Does re-opening schools contribute to the  
305 spread of SARS-CoV-2? Evidence from staggered summer breaks in Germany. *Journal*  
306 *of Public Economics.* 2021;198:104426. doi:  
307 <https://doi.org/10.1016/j.jpubeco.2021.104426>.
- 308 14. Iwata K, Doi A, Miyakoshi C. Was school closure effective in mitigating  
309 coronavirus disease 2019 (COVID-19)? Time series analysis using Bayesian inference.  
310 *Int J Infect Dis.* 2020;99:57-61. Epub 2020/08/04. doi: 10.1016/j.ijid.2020.07.052.  
311 PubMed PMID: 32745628; PubMed Central PMCID: PMC7836901.
- 312 15. Davies NG, Kucharski AJ, Eggo RM, Gimma A, Edmunds WJ, Centre for the  
313 Mathematical Modelling of Infectious Diseases C-wg. Effects of non-pharmaceutical  
314 interventions on COVID-19 cases, deaths, and demand for hospital services in the UK:  
315 a modelling study. *Lancet Public Health.* 2020;5(7):e375-e85. Epub 20200602. doi:  
316 10.1016/S2468-2667(20)30133-X. PubMed PMID: 32502389; PubMed Central PMCID:  
317 PMC7266572.
- 318 16. Matzinger P, Skinner J. Strong impact of closing schools, closing bars and  
319 wearing masks during the Covid-19 pandemic: results from a simple and revealing  
320 analysis. *medRxiv.* 2020. Epub 20200928. doi: 10.1101/2020.09.26.20202457. PubMed  
321 PMID: 33024976; PubMed Central PMCID: PMC7536875.
- 322 17. Auger KA, Shah SS, Richardson T, Hartley D, Hall M, Warniment A, et al.  
323 Association Between Statewide School Closure and COVID-19 Incidence and Mortality  
324 in the US. *JAMA.* 2020;324(9):859-70. Epub 2020/08/04. doi:  
325 10.1001/jama.2020.14348. PubMed PMID: 32745200; PubMed Central PMCID:  
326 PMC7391181.
- 327 18. Banholzer N, van Weenen E, Lison A, Cenedese A, Seeliger A, Kratzwald B, et  
328 al. Estimating the effects of non-pharmaceutical interventions on the number of new  
329 infections with COVID-19 during the first epidemic wave. *PLoS one.*

- 330 2021;16(6):e0252827. Epub 20210602. doi: 10.1371/journal.pone.0252827. PubMed  
331 PMID: 34077448; PubMed Central PMCID: PMC8171941.
- 332 19. Brauner JM, Mindermann S, Sharma M, Johnston D, Salvatier J, Gavenciak T, et  
333 al. Inferring the effectiveness of government interventions against COVID-19. *Science*.  
334 2021;371(6531). Epub 20201215. doi: 10.1126/science.abd9338. PubMed PMID:  
335 33323424; PubMed Central PMCID: PMC877495.
- 336 20. Li Y, Campbell H, Kulkarni D, Harpur A, Nundy M, Wang X, et al. The temporal  
337 association of introducing and lifting non-pharmaceutical interventions with the time-  
338 varying reproduction number (R) of SARS-CoV-2: a modelling study across 131  
339 countries. *The Lancet Infectious diseases*. 2021;21(2):193-202. Epub 20201022. doi:  
340 10.1016/S1473-3099(20)30785-4. PubMed PMID: 33729915; PubMed Central PMCID:  
341 PMC87581351.
- 342 21. Stage HB, Shingleton J, Ghosh S, Scarabel F, Pellis L, Finnie T. Shut and re-  
343 open: the role of schools in the spread of COVID-19 in Europe. *Philosophical*  
344 *transactions of the Royal Society of London Series B, Biological sciences*.  
345 2021;376(1829):20200277. Epub 20210531. doi: 10.1098/rstb.2020.0277. PubMed  
346 PMID: 34053270; PubMed Central PMCID: PMC8165592.
- 347 22. Davies NG, Klepac P, Liu Y, Prem K, Jit M, group CC-w, et al. Age-dependent  
348 effects in the transmission and control of COVID-19 epidemics. *Nat Med*.  
349 2020;26(8):1205-11. Epub 20200616. doi: 10.1038/s41591-020-0962-9. PubMed PMID:  
350 32546824.
- 351 23. Liu Y, Morgenstern C, Kelly J, Lowe R, Group CC-W, Jit M. The impact of non-  
352 pharmaceutical interventions on SARS-CoV-2 transmission across 130 countries and  
353 territories. *BMC Med*. 2021;19(1):40. Epub 20210205. doi: 10.1186/s12916-020-01872-  
354 8. PubMed PMID: 33541353; PubMed Central PMCID: PMC87861967.
- 355 24. Alban Conto C, Akseer S, Dreesen T, Kamei A, Mizunoya S, Rigole A. Potential  
356 effects of COVID-19 school closures on foundational skills and Country responses for  
357 mitigating learning loss. *Int J Educ Dev*. 2021;87:102434. Epub 20211011. doi:  
358 10.1016/j.ijedudev.2021.102434. PubMed PMID: 34658500; PubMed Central PMCID:  
359 PMC8504478.
- 360 25. Mueed A, Aliani R, Abdullah M, Kazmi T, Sultan F, Khan A. School closures help  
361 reduce the spread of COVID-19: A pre- and post-intervention analysis in Pakistan.  
362 *PLOS Global Public Health*. 2022;2(4):e0000266. doi: 10.1371/journal.pgph.0000266.
- 363 26. All education institutions to close down from Nov 26 as Covid-19 positivity rises.  
364 *Dawn*. 2020.
- 365 27. Nader IW, Zeilinger EL, Jomar D, Zauchner C. Onset of effects of non-  
366 pharmaceutical interventions on COVID-19 infection rates in 176 countries. *BMC public*  
367 *health*. 2021;21(1):1472. doi: 10.1186/s12889-021-11530-0.

- 368 28. Ingelbeen B, Peckeu L, Laga M, Hendrix I, Neven I, van der Sande MA, et al.  
369 Reducing contacts to stop SARS-CoV-2 transmission during the second pandemic  
370 wave in Brussels, Belgium, August to November 2020. *Euro surveillance : bulletin*  
371 *Europeen sur les maladies transmissibles = European communicable disease bulletin.*  
372 2021;26(7). doi: 10.2807/1560-7917.ES.2021.26.7.2100065. PubMed PMID: 33602386;  
373 PubMed Central PMCID: PMCPMC7897911.
- 374 29. Stein-Zamir C, Abramson N, Shoob H, Libal E, Bitan M, Cardash T, et al. A large  
375 COVID-19 outbreak in a high school 10 days after schools' reopening, Israel, May 2020.  
376 *Euro surveillance : bulletin Europeen sur les maladies transmissibles = European*  
377 *communicable disease bulletin.* 2020;25(29). doi: 10.2807/1560-  
378 7917.ES.2020.25.29.2001352. PubMed PMID: 32720636; PubMed Central PMCID:  
379 PMCPMC7384285.
- 380 30. Linden A. Conducting Interrupted Time-series Analysis for Single- and Multiple-  
381 group Comparisons. *The Stata Journal.* 2015;15(2):480-500. doi:  
382 10.1177/1536867x1501500208.
- 383 31. Linden A. A Comprehensive set of Postestimation Measures to Enrich  
384 Interrupted Time-series Analysis. *The Stata Journal.* 2017;17(1):73-88. doi:  
385 10.1177/1536867x1701700105.
- 386 32. Newey WK, West KD. A Simple, Positive Semi-Definite, Heteroskedasticity and  
387 Autocorrelation Consistent Covariance Matrix. *Econometrica.* 1987;55(3):703-8. doi:  
388 10.2307/1913610.
- 389 33. Statistics PBo. 2017 Census - Area, Population by sex, sex ratio, population  
390 density, urban proportion, household size and annual growth rate (Sindh). Islamabad,  
391 Pakistan: Pakistan Bureau of Statistics, 2021.
- 392 34. North DC, Wallis JJ, Wieingast BR. *Violence and Social Orders: A Conceptual*  
393 *Framework for Interpreting Recorded Human History.* Cambridge: Cambridge University  
394 Press; 2009. 346 p.
- 395 35. Abela IA, Pasin C, Schwarzmüller M, Epp S, Sickmann ME, Schanz MM, et al.  
396 Multifactorial seroprofiling dissects the contribution of pre-existing human coronaviruses  
397 responses to SARS-CoV-2 immunity. *Nature Communications.* 2021;12(1):6703. doi:  
398 10.1038/s41467-021-27040-x.
- 399 36. Shah D, Amin N, Kakli MB, Piracha ZF, Zia MA. *Pakistan Education Statistics*  
400 *2016-17. National Education Management Information System (NEMIS).* Academy of  
401 Educational Planning and Management (AEPAM), 2018.
- 402 37. Table 4 - Population by single year age, sex and rural/urban. Islamabad,  
403 Pakistan: PBS; 2018.

- 404 38. Rauscher E. Lower State COVID-19 Deaths and Cases with Earlier School  
405 Closure in the U.S. medRxiv. 2020:2020.05.09.20096594. doi:  
406 10.1101/2020.05.09.20096594.
- 407 39. Yehya N, Venkataramani A, Harhay MO. Statewide Interventions and  
408 Coronavirus Disease 2019 Mortality in the United States: An Observational Study.  
409 Clinical infectious diseases : an official publication of the Infectious Diseases Society of  
410 America. 2021;73(7):e1863-e9. doi: 10.1093/cid/ciaa923. PubMed PMID: 32634828;  
411 PubMed Central PMCID: PMC7454446.
- 412 40. Klimek-Tulwin M, Tulwin T. Early school closures can reduce the first-wave of the  
413 COVID-19 pandemic development. Z Gesundh Wiss. 2020:1-7. Epub 20201015. doi:  
414 10.1007/s10389-020-01391-z. PubMed PMID: 33078090; PubMed Central PMCID:  
415 PMC7557316.
- 416 41. Piovani D, Christodoulou MN, Hadjidemetriou A, Pantavou K, Zaza P, Bagos PG,  
417 et al. Effect of early application of social distancing interventions on COVID-19 mortality  
418 over the first pandemic wave: An analysis of longitudinal data from 37 countries. J  
419 Infect. 2021;82(1):133-42. Epub 20201201. doi: 10.1016/j.jinf.2020.11.033. PubMed  
420 PMID: 33275956; PubMed Central PMCID: PMC7706420.
- 421 42. Garchitorena A, Gruson H, Cazelles B, Karki T, Sudre B, Roche B. Integrated  
422 packages of non-pharmaceutical interventions increased public health response  
423 efficiency against COVID-19 during the first European wave: evidence from 32  
424 European countries. medRxiv. 2020:2020.08.17.20174821. doi:  
425 10.1101/2020.08.17.20174821.
- 426 43. Chang SL, Harding N, Zachreson C, Cliff OM, Prokopenko M. Modelling  
427 transmission and control of the COVID-19 pandemic in Australia. Nat Commun.  
428 2020;11(1):5710. Epub 20201111. doi: 10.1038/s41467-020-19393-6. PubMed PMID:  
429 33177507; PubMed Central PMCID: PMC7659014.

## 430 **List of legends**

431 **Table 2. Key intervention dates**

432 **Table 2. Summary statistics of daily COVID-19 cases (per 100,000 population) in**  
433 **each city**

434 **Table 3. Rates of Change in Daily COVID-19 cases (per 100,000 population)**  
435 **through Interrupted Time Series Analysis**

436 **S1 Text: Methodology steps**

437 **S1 Data: Dataset for 10-days delay**

438 **S2 Data: Dataset for 20-days delay**
